# Supplementary material for: Single-cell RNA analysis identifies pre-migratory neural crest cells expressing markers of differentiated derivatives
Source: eLife. 2021 Aug 16;10:e66078. doi: 10.7554/eLife.66078 (PMC8367380; doi:10.7554/eLife.66078)
Supplement: Figure 3—source data 1. [file elife-66078-fig3-data1.xlsx]

## Sheet: Aox5_gjb8
Series	CellID	Vol.micron	Vol.pixel	Aox5_Mean	Gjb8_Mean	Aox5_background	Gjb8_background	CTCF_aox5	CTCF_gjb8
series1	obj1-val2	1345.78	138572	17.2859	30.3965	1.362	1.083	21430.1	39449.4
series1	obj2-val3	477.139	49130	14.1869	23.7421	1.362	1.083	6119.28	10811.5
series1	obj3-val4	558.582	57516	17.9439	23.3568	1.362	1.083	9262.36	12441.7
series1	obj4-val5	350.944	36136	0.97371	0.824137	1.362	1.083	-136.268	-90.8467
series1	obj5-val6	219.01	22551	1.21418	0.737883	1.362	1.083	-32.3738	-75.5841
series1	obj6-val7	324.198	33382	1.16	0.970493	1.362	1.083	-65.4892	-36.4745
series1	obj7-val8	386.761	39824	2.09585	2.2109	1.362	1.083	283.824	436.229
series2	obj1-val2	358.364	36900	16.5271	11.9804	1.334	0.774	5444.66	4015.96
series2	obj2-val3	447.314	46059	20.6036	28.7658	1.334	0.774	8619.58	12521.1
series2	obj3-val4	727.897	74950	22.8712	34.2673	1.334	0.774	15676.8	24379.7
series2	obj4-val5	264.296	27214	14.2945	12.5929	1.334	0.774	3425.4	3123.7
series2	obj5-val6	170.004	17505	1.09672	0.499686	1.334	0.774	-40.3395	-46.6346
series2	obj6-val7	102.158	10519	0.758912	0.462401	1.334	0.774	-58.7498	-31.8323
series2	obj7-val8	47.3157	4872	0.8867	0.536946	1.334	0.774	-21.1644	-11.2164
series3	obj1-val2	989.435	101880	6.40244	8.1897	1.273	1.42	5075.25	6698.18
series3	obj2-val3	534.128	54998	1.71799	2.14788	1.273	1.42	237.681	388.78
series3	obj3-val4	914.247	94138	12.9129	24.2945	1.273	1.42	10641.8	20913
series3	obj4-val5	575.879	59297	17.578	14.8618	1.273	1.42	9389.7	7740.85
series4	obj1-val2	352.217	36267	1.0753	0.536714	1.21	0.613	-47.4427	-26.8693
series4	obj2-val3	681.184	70140	9.79865	8.26933	1.21	0.613	5850.45	5215.37
series4	obj3-val4	429.62	44237	3.9946	3.96069	1.21	0.613	1196.32	1438.23
series4	obj4-val5	206.977	21312	11.6806	11.2904	1.21	0.613	2167.18	2209.98
series4	obj5-val6	539.567	55558	2.3897	0.981749	1.21	0.613	636.527	198.965
series4	obj6-val7	270.648	27868	1.51051	0.470289	1.21	0.613	81.3334	-38.6245
series5	obj1-val2	889.637	91604	0.846306	0.579767	0.796	0.673	44.7539	-82.9433
series5	obj2-val3	562.36	57905	5.84057	7.50847	0.796	0.673	2836.86	3844
series5	obj3-val4	1067.16	109883	5.90691	4.59949	0.796	0.673	5454.15	4190.19
series5	obj4-val5	365.26	37610	7.46732	4.34509	0.796	0.673	2436.76	1341.27
series5	obj5-val6	448.451	46176	1.47354	1.1302	0.796	0.673	303.841	205.031
series5	obj6-val7	421.063	43356	0.695913	0.352062	0.796	0.673	-42.143	-135.135
series6	obj1-val2	273.648	28177	1.16616	0.551478	1.61	1.164	-121.455	-167.616
series6	obj2-val3	258.537	26621	1.3593	0.574884	1.61	1.164	-64.8145	-152.308
series6	obj3-val4	301.89	31085	1.14682	0.654753	1.61	1.164	-139.829	-153.737
series6	obj4-val5	211.853	21814	23.9484	27.0207	1.61	1.164	4732.45	5477.8
series6	obj5-val6	424.87	43748	9.4571	14.1164	1.61	1.164	3334	5503.11
series6	obj6-val7	300.502	30942	17.2556	27.7709	1.61	1.164	4701.54	7995.41
series6	obj7-val8	189.156	19477	20.9383	19.7271	1.61	1.164	3656.07	3511.32
series7	obj1-val2	664.197	68391	2.99444	2.89879	1.015	1.166	1314.74	1150.91
series7	obj2-val3	207.88	21405	5.58977	8.70628	1.015	1.166	951.005	1567.48
series7	obj3-val4	602.421	62030	23.2928	49.936	1.015	1.166	13420.6	29380.1
series7	obj4-val5	317.089	32650	23.3361	46.9179	1.015	1.166	7077.77	14507.4
series7	obj5-val6	124.495	12819	3.15953	3.29456	1.015	1.166	266.983	264.996
series8	obj1-val2	349.342	35971	1.22082	0.727308	1.257	1.064	-12.6403	-117.621
series8	obj2-val3	411.964	42419	1.15936	0.631816	1.257	1.064	-40.2231	-178.044
series8	obj3-val4	382.352	39370	1.08654	0.624105	1.257	1.064	-65.1766	-168.195
series8	obj4-val5	347.361	35767	1.98359	2.88199	1.257	1.064	252.388	631.497
series8	obj5-val6	225.216	23190	20.2602	30.5699	1.257	1.064	4279.81	6645.19
series8	obj6-val7	413.158	42542	24.3009	25.2341	1.257	1.064	9520.77	9986.05
series8	obj7-val8	319.576	32906	9.22458	16.6561	1.257	1.064	2546.24	4982.84
series8	obj8-val9	323.722	33333	13.7753	16.7068	1.257	1.064	4052.46	5063.94
series8	obj9-val10	186.651	19219	1.05333	0.73854	1.257	1.064	-38.0146	-60.7473
series9	obj1-val2	736.094	75794	0.696981	0.744188	0.973	0.98	-203.176	-173.58
series9	obj2-val3	688.244	70867	0.858975	0.702612	0.973	0.98	-78.4768	-190.911
series9	obj3-val4	218.845	22534	0.869619	0.915017	0.973	0.98	-22.6244	-14.2211
series9	obj4-val5	855.743	88114	7.16857	7.67448	0.973	0.98	5301.81	5728.75
series9	obj5-val6	424.016	43660	1.1074	1.00969	0.973	0.98	56.9869	12.5884
series9	obj6-val7	244.62	25188	1.0904	0.854335	0.973	0.98	28.7184	-30.7401
series9	obj7-val8	1324.35	136365	11.0689	12.1968	0.973	0.98	13370.4	14854.9

## Sheet: Aox5_slc2a15b
Series	Object	Vol.micron	Vol.pixel	Aox5_mean	Slc2a15b_mean	Aox5_background	Slc2a15b_background	CTCF_aox5	CTCF_slc2a15b
Series1	obj1-val2	1777.41	183016	21.5502	19.9119	3.671	3.123	31778.7	29840.7
Series1	obj2-val3	2112.86	217557	43.6788	34.6911	3.671	3.123	84531.1	66699
Series1	obj3-val4	203.394	20943	13.5933	13.9117	3.671	3.123	2018.14	2194.35
Series1	obj4-val5	370.582	38158	4.25981	3.71248	3.671	3.123	218.204	218.452
Series1	obj5-val6	385.12	39655	3.73355	4.03467	3.671	3.123	24.09	351.104
Series1	obj6-val7	163.634	16849	4.74871	7.24245	3.671	3.123	176.349	674.08
Series2	obj1-val2	684.437	70475	4.99621	9.62899	2.093	2.287	1987.07	5025.13
Series2	obj2-val3	529.408	54512	3.70957	4.34281	2.093	2.287	855.824	1088.36
Series2	obj3-val4	1567.98	161452	14.2534	12.6938	2.093	2.287	19067.4	16317.6
Series2	obj4-val5	465.961	47979	35.2616	35.8265	2.093	2.287	15455.3	15628.1
Series2	obj5-val6	846.225	87134	4.13983	7.60755	2.093	2.287	1732.08	4502.38
Series2	obj6-val7	49.4718	5094	23.2748	12.8145	2.093	2.287	1047.9	520.813
Series3	obj1-val2	907.516	93445	8.54631	3.51909	6.244	1.7	2089.38	1650.85
Series3	obj2-val3	1392.76	143410	24.0778	7.76898	6.244	1.7	24838.3	8452.66
Series3	obj3-val4	1030.66	106125	16.9529	4.746	6.244	1.7	11037.3	3139.39
Series4	obj1-val2	395.745	40749	4.84034	2.57565	4.525	2.314	124.794	103.545
Series4	obj2-val3	1762.17	181447	14.5331	5.51806	4.525	2.314	17635.9	5646.11
Series4	obj3-val4	881.586	90775	32.2789	18.1421	4.525	2.314	24467.5	13953.8
Series4	obj4-val5	633.79	65260	27.2885	13.4341	4.525	2.314	14427.3	7047.83
Series4	obj5-val6	1312.14	135108	14.7599	5.61614	4.525	2.314	13429.6	4332.87
Series4	obj6-val7	251.37	25883	4.83874	2.66461	4.525	2.314	78.8637	88.1317
Series5	obj1-val2	1679.74	172959	21.8834	10.8363	4.879	2.848	28562.9	13418.2
Series5	obj2-val3	411.876	42410	21.4672	8.7319	4.879	2.848	6832.26	2423.44
Series5	obj3-val4	1034.55	106525	19.4966	9.21071	4.879	2.848	15122.6	6582.52
Series5	obj4-val5	745.038	76715	4.96191	4.27456	4.879	2.848	61.7718	1062.84
Series5	obj5-val6	350.575	36098	4.3544	3.76414	4.879	2.848	-183.913	321.177
Series5	obj6-val7	255.575	26316	4.48803	3.03374	4.879	2.848	-99.9221	47.4714
Series5	obj7-val8	1192.1	122748	4.05148	2.90179	4.879	2.848	-986.487	64.1239
Series5	obj8-val9	334.085	34400	7.73616	4.29794	4.879	2.848	954.535	484.402
Series5	obj9-val10	231.101	23796	6.61212	2.88389	4.879	2.848	400.526	8.29377
Series6	obj1-val2	2760.75	284268	21.8938	7.14574	5.283	2.648	45858.1	12417.1
Series6	obj2-val3	156.029	16066	4.21051	1.86412	5.283	2.648	-167.34	-122.308
Series6	obj3-val4	611.132	62927	5.63126	2.88954	5.283	2.648	212.83	147.612
Series6	obj4-val5	135.703	13973	6.296	3.98118	5.283	2.648	137.467	180.916
Series6	obj5-val6	122.922	12657	5.38058	3.40002	5.283	2.648	11.9947	92.4392
Series7	obj1-val2	569.362	58626	30.045	16.8044	4.88	2.436	14328	8180.81
Series7	obj2-val3	383.518	39490	41.255	15.9351	4.88	2.436	13950.5	5177.14
Series7	obj3-val4	200.694	20665	53.1425	41.2548	4.88	2.436	9685.98	7790.69
Series7	obj4-val5	557.786	57434	34.4754	40.8977	4.88	2.436	16507.9	21453.4
Series7	obj5-val6	384.78	39620	6.51045	4.94975	4.88	2.436	627.365	967.24
Series7	obj6-val7	161.458	16625	4.32854	3.42707	4.88	2.436	-89.0375	160.016
Series7	obj7-val8	44.1788	4549	6.19499	3.61552	4.88	2.436	58.0946	52.1098
Series8	obj1-val2	472.39	48641	2.83841	1.67513	4.53	1.725	-799.092	-23.5581
Series8	obj2-val3	755.071	77748	9.19234	2.56145	4.53	1.725	3520.4	631.583
Series8	obj3-val4	511.898	52709	2.83492	2.4995	4.53	1.725	-867.706	396.463
Series9	obj1-val2	548.472	56475	29.6857	12.7184	2.845	2.722	14721.4	5482.72
Series9	obj2-val3	221.71	22829	22.7714	15.9458	2.845	2.722	4417.88	2931.84
Series9	obj3-val4	1314.6	135361	10.2857	11.7558	2.845	2.722	9781.46	11875.8
Series9	obj4-val5	242.114	24930	2.88989	3.5223	2.845	2.722	10.8689	193.765
