# Supplementary material for: Single-cell RNA analysis identifies pre-migratory neural crest cells expressing markers of differentiated derivatives
Source: eLife. 2021 Aug 16;10:e66078. doi: 10.7554/eLife.66078 (PMC8367380; doi:10.7554/eLife.66078)
Supplement: Figure 3—source data 2. [file elife-66078-fig3-data2.xlsx]

## Sheet: rawdata
SeriesDate	CellPhenotype	Testing Gene
S1_20201201	Both	cxcr4b
S1_20201202	Both	cxcr4b
S1_20201203	Both	cxcr4b
S1_20201204	Both	cxcr4b
S1_20201205	Both	cxcr4b
S1_20201206	Both	cxcr4b
S1_20201207	Both	cxcr4b
S1_20201208	Both	cxcr4b
S1_20201209	Both	cxcr4b
S1_20201210	Both	cxcr4b
S1_20201211	Both	cxcr4b
S1_20201212	Both	cxcr4b
S1_20201213	Both	cxcr4b
S1_20201214	Both	cxcr4b
S1_20201215	Both	cxcr4b
S1_20201216	Both	cxcr4b
S1_20201217	Both	cxcr4b
S1_20201218	Both	cxcr4b
S1_20201219	Both	cxcr4b
S1_20201220	Both	cxcr4b
S1_20201221	Both	cxcr4b
S1_20201222	Both	cxcr4b
S1_20201223	Both	cxcr4b
S1_20201224	Both	cxcr4b
S1_20201225	Both	cxcr4b
S1_20201226	Both	cxcr4b
S1_20201227	Both	cxcr4b
S1_20201228	Both	cxcr4b
S1_20201229	Both	cxcr4b
S1_20201230	Both	cxcr4b
S1_20201231	Both	cxcr4b
S1_20201232	Both	cxcr4b
S1_20201233	Both	cxcr4b
S1_20201234	Both	cxcr4b
S1_20201235	Both	cxcr4b
S2_20201235	Both	cxcr4b
S2_20201235	Both	cxcr4b
S2_20201235	Both	cxcr4b
S2_20201235	Both	cxcr4b
S2_20201235	Both	cxcr4b
S2_20201235	Both	cxcr4b
S2_20201235	Both	cxcr4b
S2_20201235	Both	cxcr4b
S2_20201235	Both	cxcr4b
S2_20201235	Both	cxcr4b
S2_20201235	Both	cxcr4b
S2_20201235	Both	cxcr4b
S2_20201235	Both	cxcr4b
S2_20201235	Both	cxcr4b
S2_20201235	Both	cxcr4b
S2_20201235	Both	cxcr4b
S2_20201235	Both	cxcr4b
S2_20201235	Both	cxcr4b
S2_20201235	Both	cxcr4b
S2_20201235	Both	cxcr4b
S2_20201235	Both	cxcr4b
S2_20201235	Both	cxcr4b
S2_20201235	Both	cxcr4b
S2_20201235	Both	cxcr4b
S2_20201235	Both	cxcr4b
S2_20201235	Both	cxcr4b
S2_20201235	Both	cxcr4b
S2_20201235	Both	cxcr4b
S2_20201235	Both	cxcr4b
S2_20201235	Both	cxcr4b
S2_20201235	Both	cxcr4b
S2_20201235	Both	cxcr4b
S2_20201235	Both	cxcr4b
S2_20201235	Both	cxcr4b
S2_20201235	Both	cxcr4b
S2_20201235	Both	cxcr4b
S2_20201235	Both	cxcr4b
S2_20201235	Both	cxcr4b
S2_20201235	Both	cxcr4b
S2_20201235	Both	cxcr4b
S2_20201235	cxcr4b	cxcr4b
S3_20201235	Both	cxcr4b
S3_20201235	Both	cxcr4b
S3_20201235	Both	cxcr4b
S3_20201235	Both	cxcr4b
S3_20201235	Both	cxcr4b
S3_20201235	Both	cxcr4b
S3_20201235	Both	cxcr4b
S3_20201235	Both	cxcr4b
S3_20201235	Both	cxcr4b
S3_20201235	Both	cxcr4b
S3_20201235	Both	cxcr4b
S3_20201235	Both	cxcr4b
S3_20201235	Both	cxcr4b
S3_20201235	Both	cxcr4b
S3_20201235	Both	cxcr4b
S3_20201235	Both	cxcr4b
S3_20201235	Both	cxcr4b
S3_20201235	Both	cxcr4b
S3_20201235	Both	cxcr4b
S3_20201235	Both	cxcr4b
S3_20201235	Both	cxcr4b
S3_20201235	Both	cxcr4b
S3_20201235	Both	cxcr4b
S3_20201235	Both	cxcr4b
S3_20201235	Both	cxcr4b
S3_20201235	Both	cxcr4b
S3_20201235	Both	cxcr4b
S3_20201235	Both	cxcr4b
S3_20201235	Both	cxcr4b
S3_20201235	Both	cxcr4b
S3_20201235	Both	cxcr4b
S3_20201235	cxcr4b	cxcr4b
S3_20201235	Hnk	cxcr4b
S3_20201235	Hnk	cxcr4b
S4_20201235	Both	cxcr4b
S4_20201235	Both	cxcr4b
S4_20201235	Both	cxcr4b
S4_20201235	Both	cxcr4b
S4_20201235	Both	cxcr4b
S4_20201235	Both	cxcr4b
S4_20201235	Both	cxcr4b
S4_20201235	Both	cxcr4b
S4_20201235	Both	cxcr4b
S4_20201235	Both	cxcr4b
S4_20201235	Both	cxcr4b
S4_20201235	Both	cxcr4b
S4_20201235	Both	cxcr4b
S4_20201235	Both	cxcr4b
S4_20201235	Both	cxcr4b
S4_20201235	Both	cxcr4b
S4_20201235	Both	cxcr4b
S4_20201235	Both	cxcr4b
S4_20201235	Both	cxcr4b
S4_20201235	Both	cxcr4b
S4_20201235	Both	cxcr4b
S4_20201235	Both	cxcr4b
S4_20201235	Both	cxcr4b
S4_20201235	Both	cxcr4b
S4_20201235	Both	cxcr4b
S4_20201235	Both	cxcr4b
S4_20201235	Both	cxcr4b
S4_20201235	Both	cxcr4b
S4_20201235	Both	cxcr4b
S4_20201235	Both	cxcr4b
S4_20201235	Both	cxcr4b
S4_20201235	Both	cxcr4b
S4_20201235	Both	cxcr4b
S4_20201235	Both	cxcr4b
S4_20201235	Both	cxcr4b
S4_20201235	Both	cxcr4b
S4_20201235	Both	cxcr4b
S4_20201235	Both	cxcr4b
S4_20201235	Both	cxcr4b
S4_20201235	Both	cxcr4b
S4_20201235	Both	cxcr4b
S4_20201235	Both	cxcr4b
S4_20201235	Both	cxcr4b
S4_20201235	Both	cxcr4b
S4_20201235	Both	cxcr4b
S4_20201235	Both	cxcr4b
S4_20201235	Both	cxcr4b
S4_20201235	Both	cxcr4b
S4_20201235	Both	cxcr4b
S4_20201235	Both	cxcr4b
S5_20201235	Both	cxcr4b
S5_20201235	Both	cxcr4b
S5_20201235	Both	cxcr4b
S5_20201235	Both	cxcr4b
S5_20201235	Both	cxcr4b
S5_20201235	Both	cxcr4b
S5_20201235	Both	cxcr4b
S5_20201235	Both	cxcr4b
S5_20201235	Both	cxcr4b
S5_20201235	Both	cxcr4b
S5_20201235	Both	cxcr4b
S5_20201235	Both	cxcr4b
S5_20201235	Both	cxcr4b
S5_20201235	Both	cxcr4b
S5_20201235	Both	cxcr4b
S5_20201235	Both	cxcr4b
S5_20201235	Both	cxcr4b
S5_20201235	Both	cxcr4b
S5_20201235	Both	cxcr4b
S5_20201235	Both	cxcr4b
S5_20201235	Both	cxcr4b
S5_20201235	Both	cxcr4b
S5_20201235	Both	cxcr4b
S5_20201235	Both	cxcr4b
S5_20201235	Both	cxcr4b
S5_20201235	Both	cxcr4b
S5_20201235	Both	cxcr4b
S5_20201235	Both	cxcr4b
S5_20201235	Both	cxcr4b
S5_20201235	Both	cxcr4b
S5_20201235	Both	cxcr4b
S5_20201235	Both	cxcr4b
S5_20201235	Both	cxcr4b
S5_20201235	Both	cxcr4b
S5_20201235	Both	cxcr4b
S5_20201235	Both	cxcr4b
S5_20201235	Both	cxcr4b
S5_20201235	Both	cxcr4b
S5_20201235	Both	cxcr4b
S5_20201235	Both	cxcr4b
S5_20201235	Both	cxcr4b
S5_20201235	Both	cxcr4b
S5_20201235	Both	cxcr4b
S5_20201235	Both	cxcr4b
S5_20201235	Both	cxcr4b
S5_20201235	Both	cxcr4b
S5_20201235	Both	cxcr4b
S5_20201235	Both	cxcr4b
S5_20201235	Both	cxcr4b
S5_20201235	Both	cxcr4b
20201201Series1	Both	Fgf13a
20201201Series1	Both	Fgf13a
20201201Series1	Both	Fgf13a
20201201Series1	Both	Fgf13a
20201201Series1	Both	Fgf13a
20201201Series1	Both	Fgf13a
20201201Series1	Both	Fgf13a
20201201Series1	Both	Fgf13a
20201201Series1	Both	Fgf13a
20201201Series1	Both	Fgf13a
20201201Series1	Both	Fgf13a
20201201Series1	Both	Fgf13a
20201201Series1	Both	Fgf13a
20201201Series1	Both	Fgf13a
20201201Series1	Both	Fgf13a
20201201Series1	Both	Fgf13a
20201201Series1	Both	Fgf13a
20201201Series1	Both	Fgf13a
20201201Series1	Both	Fgf13a
20201201Series1	Both	Fgf13a
20201201Series1	Both	Fgf13a
20201201Series1	Both	Fgf13a
20201201Series1	Both	Fgf13a
20201201Series1	Both	Fgf13a
20201201Series1	Both	Fgf13a
20201201Series1	Both	Fgf13a
20201201Series1	Both	Fgf13a
20201201Series1	Both	Fgf13a
20201201Series1	Both	Fgf13a
20201201Series1	Both	Fgf13a
20201201Series1	Both	Fgf13a
20201201Series1	Both	Fgf13a
20201201Series1	Both	Fgf13a
20201201Series1	Both	Fgf13a
20201201Series1	Both	Fgf13a
20201201Series1	Both	Fgf13a
20201201Series1	Both	Fgf13a
20201201Series1	Both	Fgf13a
20201201Series1	Both	Fgf13a
20201201Series1	Both	Fgf13a
20201201Series2	Both	Fgf13a
20201201Series2	Both	Fgf13a
20201201Series2	Both	Fgf13a
20201201Series2	Both	Fgf13a
20201201Series2	Both	Fgf13a
20201201Series2	Both	Fgf13a
20201201Series2	Both	Fgf13a
20201201Series2	Both	Fgf13a
20201201Series2	Both	Fgf13a
20201201Series2	Both	Fgf13a
20201201Series2	Both	Fgf13a
20201201Series2	Both	Fgf13a
20201201Series2	Both	Fgf13a
20201201Series2	Both	Fgf13a
20201201Series2	Both	Fgf13a
20201201Series2	Both	Fgf13a
20201201Series2	Both	Fgf13a
20201201Series2	Both	Fgf13a
20201201Series2	Both	Fgf13a
20201201Series2	Both	Fgf13a
20201201Series2	Both	Fgf13a
20201201Series2	Both	Fgf13a
20201201Series2	Both	Fgf13a
20201201Series2	Both	Fgf13a
20201201Series2	Both	Fgf13a
20201201Series2	Both	Fgf13a
20201201Series2	Both	Fgf13a
20201201Series2	Both	Fgf13a
20201201Series2	Both	Fgf13a
20201201Series2	Both	Fgf13a
20201201Series2	Both	Fgf13a
20201201Series2	Both	Fgf13a
20201201Series2	Both	Fgf13a
20201201Series2	Both	Fgf13a
20201201Series2	Both	Fgf13a
20201201Series2	Both	Fgf13a
20201201Series2	Both	Fgf13a
20201201Series2	Both	Fgf13a
20201201Series2	Both	Fgf13a
20201201Series2	Both	Fgf13a
20201201Series2	Both	Fgf13a
20201201Series2	Both	Fgf13a
20201201Series2	Fgf13a	Fgf13a
20201201Series2	Fgf13a	Fgf13a
20201109Series1	Both	Fgf13a
20201109Series1	Both	Fgf13a
20201109Series1	Both	Fgf13a
20201109Series1	Both	Fgf13a
20201109Series1	Both	Fgf13a
20201109Series1	Both	Fgf13a
20201109Series1	Both	Fgf13a
20201109Series1	Both	Fgf13a
20201109Series1	Both	Fgf13a
20201109Series1	Both	Fgf13a
20201109Series1	Both	Fgf13a
20201109Series1	Both	Fgf13a
20201109Series1	Both	Fgf13a
20201109Series1	Both	Fgf13a
20201109Series1	Both	Fgf13a
20201109Series1	Both	Fgf13a
20201109Series1	Both	Fgf13a
20201109Series1	Both	Fgf13a
20201109Series1	Both	Fgf13a
20201109Series1	Both	Fgf13a
20201109Series1	Both	Fgf13a
20201109Series1	Both	Fgf13a
20201109Series1	Both	Fgf13a
20201109Series1	Both	Fgf13a
20201109Series1	Both	Fgf13a
20201109Series1	Both	Fgf13a
20201109Series1	Both	Fgf13a
20201109Series1	Both	Fgf13a
20201109Series1	Both	Fgf13a
20201109Series1	Both	Fgf13a
20201109Series1	Both	Fgf13a
20201109Series1	Both	Fgf13a
20201109Series1	Both	Fgf13a
20201109Series1	Both	Fgf13a
20201109Series1	Both	Fgf13a
20201109Series1	Both	Fgf13a
20201109Series1	Both	Fgf13a
20201109Series1	Both	Fgf13a
20201109Series1	Both	Fgf13a
20201109Series1	Both	Fgf13a
20201109Series1	Both	Fgf13a
20201109Series1	Both	Fgf13a
20201109Series1	Both	Fgf13a
20201109Series1	Both	Fgf13a
20201109Series1	Both	Fgf13a
20201109Series1	Both	Fgf13a
20201109Series1	Both	Fgf13a
20201109Series1	Both	Fgf13a
20201109Series1	Both	Fgf13a
20201109Series1	Both	Fgf13a
20201109Series1	Both	Fgf13a
20201109Series1	Both	Fgf13a
20201109Series1	Both	Fgf13a
20201109Series1	Both	Fgf13a
20201109Series1	Both	Fgf13a
20201109Series1	Both	Fgf13a
20201109Series1	Both	Fgf13a
20201109Series1	Both	Fgf13a
20201109Series1	Both	Fgf13a
20201109Series1	Both	Fgf13a
20201109Series1	Both	Fgf13a
20201109Series1	Both	Fgf13a
20201109Series1	Both	Fgf13a
20201109Series1	Both	Fgf13a
20201109Series1	Both	Fgf13a
20201109Series1	Both	Fgf13a
20201109Series1	Both	Fgf13a
20201109Series1	Both	Fgf13a
20201109Series1	Both	Fgf13a
20201109Series1	Both	Fgf13a
20201109Series1	Both	Fgf13a
20201109Series1	Both	Fgf13a
20201109Series1	Both	Fgf13a
20201109Series1	Both	Fgf13a
20201109Series1	Both	Fgf13a
20201109Series1	Both	Fgf13a
20201109Series1	Both	Fgf13a
20201109Series1	Both	Fgf13a
20201109Series1	Both	Fgf13a
20201109Series1	Both	Fgf13a
20201109Series1	Both	Fgf13a
20201109Series1	Both	Fgf13a
20201109Series1	Both	Fgf13a
20201109Series1	Both	Fgf13a
20201109Series1	Both	Fgf13a
20201109Series1	Both	Fgf13a
20201109Series1	Both	Fgf13a
20201109Series1	Both	Fgf13a
20201109Series1	Both	Fgf13a
20201109Series1	Both	Fgf13a
20201109Series1	Both	Fgf13a
20201109Series1	Both	Fgf13a
20201109Series1	Both	Fgf13a
20201109Series1	Both	Fgf13a
20201109Series1	Both	Fgf13a
20201109Series1	Both	Fgf13a
20201109Series1	Both	Fgf13a
20201109Series1	Both	Fgf13a
20201109Series1	Both	Fgf13a
20201109Series1	Both	Fgf13a
20201109Series1	Both	Fgf13a
20201109Series1	Both	Fgf13a
20201109Series1	Both	Fgf13a
20201109Series1	Hnk	Fgf13a
20201109Series2	Both	Fgf13a
20201109Series2	Both	Fgf13a
20201109Series2	Both	Fgf13a
20201109Series2	Both	Fgf13a
20201109Series2	Both	Fgf13a
20201109Series2	Both	Fgf13a
20201109Series2	Both	Fgf13a
20201109Series2	Both	Fgf13a
20201109Series2	Both	Fgf13a
20201109Series2	Both	Fgf13a
20201109Series2	Both	Fgf13a
20201109Series2	Both	Fgf13a
20201109Series2	Both	Fgf13a
20201109Series2	Both	Fgf13a
20201109Series2	Both	Fgf13a
20201109Series2	Both	Fgf13a
20201109Series2	Both	Fgf13a
20201109Series2	Both	Fgf13a
20201109Series2	Both	Fgf13a
20201109Series2	Both	Fgf13a
20201109Series2	Both	Fgf13a
20201109Series2	Both	Fgf13a
20201109Series2	Both	Fgf13a
20201109Series2	Both	Fgf13a
20201109Series2	Both	Fgf13a
20201109Series2	Both	Fgf13a
20201109Series2	Both	Fgf13a
20201109Series2	Both	Fgf13a
20201109Series2	Both	Fgf13a
20201109Series2	Both	Fgf13a
20201109Series2	Both	Fgf13a
20201109Series2	Both	Fgf13a
20201109Series2	Both	Fgf13a
20201109Series2	Both	Fgf13a
20201109Series2	Both	Fgf13a
20201109Series2	Both	Fgf13a
20201109Series2	Both	Fgf13a
20201109Series2	Both	Fgf13a
20201109Series2	Both	Fgf13a
20201109Series2	Both	Fgf13a
20201109Series2	Both	Fgf13a
20201109Series2	Both	Fgf13a
20201109Series2	Both	Fgf13a
20201109Series2	Both	Fgf13a
20201109Series2	Both	Fgf13a
20201109Series2	Both	Fgf13a
20201109Series2	Both	Fgf13a
20201109Series2	Both	Fgf13a
20201109Series2	Both	Fgf13a
20201109Series2	Both	Fgf13a
20201109Series2	Both	Fgf13a
20201109Series2	Both	Fgf13a
20201109Series2	Both	Fgf13a
20201109Series2	Both	Fgf13a
20201109Series2	Both	Fgf13a
20201109Series2	Both	Fgf13a
20201109Series2	Both	Fgf13a
20201109Series2	Both	Fgf13a
20201109Series2	Both	Fgf13a
20201109Series2	Both	Fgf13a
20201109Series2	Both	Fgf13a
20201109Series2	Both	Fgf13a
20201109Series2	Both	Fgf13a
20201109Series2	Both	Fgf13a
20201109Series2	Both	Fgf13a
20201109Series2	Both	Fgf13a
20201109Series2	Both	Fgf13a
20201109Series2	Both	Fgf13a
20201109Series2	Both	Fgf13a
20201109Series2	Both	Fgf13a
20201109Series2	Both	Fgf13a
20201109Series2	Both	Fgf13a
20201109Series2	Both	Fgf13a
20201109Series2	Both	Fgf13a
20201109Series2	Both	Fgf13a
20201109Series2	Both	Fgf13a
20201109Series2	Both	Fgf13a
20201109Series2	Both	Fgf13a
20201109Series2	Both	Fgf13a
20201109Series2	Both	Fgf13a
20201109Series2	Both	Fgf13a
20201109Series2	Both	Fgf13a
20201109Series2	Both	Fgf13a
20201109Series2	Both	Fgf13a
20201109Series2	Both	Fgf13a
20201109Series2	Both	Fgf13a
20201109Series2	Both	Fgf13a
20201109Series2	Both	Fgf13a
20201109Series2	Both	Fgf13a
20201109Series2	Both	Fgf13a
20201109Series2	Both	Fgf13a
20201109Series2	Both	Fgf13a
20201109Series2	Both	Fgf13a
20201109Series2	Both	Fgf13a
20201109Series2	Both	Fgf13a
20201109Series2	Both	Fgf13a
20201109Series2	Both	Fgf13a
20201109Series2	Both	Fgf13a
20201109Series2	Both	Fgf13a
20201109Series2	Both	Fgf13a
20201109Series2	Hnk	Fgf13a
20201109Series2	Hnk	Fgf13a
20201109Series2	Hnk	Fgf13a
20201109Series2	Hnk	Fgf13a
20201109Series2	Fgf13a	Fgf13a
20201109Series3	Both	Fgf13a
20201109Series3	Both	Fgf13a
20201109Series3	Both	Fgf13a
20201109Series3	Both	Fgf13a
20201109Series3	Both	Fgf13a
20201109Series3	Both	Fgf13a
20201109Series3	Both	Fgf13a
20201109Series3	Both	Fgf13a
20201109Series3	Both	Fgf13a
20201109Series3	Both	Fgf13a
20201109Series3	Both	Fgf13a
20201109Series3	Both	Fgf13a
20201109Series3	Both	Fgf13a
20201109Series3	Both	Fgf13a
20201109Series3	Both	Fgf13a
20201109Series3	Both	Fgf13a
20201109Series3	Both	Fgf13a
20201109Series3	Both	Fgf13a
20201109Series3	Both	Fgf13a
20201109Series3	Both	Fgf13a
20201109Series3	Both	Fgf13a
20201109Series3	Both	Fgf13a
20201109Series3	Both	Fgf13a
20201109Series3	Both	Fgf13a
20201109Series3	Both	Fgf13a
20201109Series3	Both	Fgf13a
20201109Series3	Both	Fgf13a
20201109Series3	Both	Fgf13a
20201109Series3	Both	Fgf13a
20201109Series3	Both	Fgf13a
20201109Series3	Both	Fgf13a
20201109Series3	Both	Fgf13a
20201109Series3	Both	Fgf13a
20201109Series3	Both	Fgf13a
20201109Series3	Both	Fgf13a
20201109Series3	Both	Fgf13a
20201109Series3	Both	Fgf13a
20201109Series3	Both	Fgf13a
20201109Series3	Both	Fgf13a
20201109Series3	Both	Fgf13a
20201109Series3	Both	Fgf13a
20201109Series3	Both	Fgf13a
20201109Series3	Both	Fgf13a
20201109Series3	Both	Fgf13a
20201109Series3	Both	Fgf13a
20201109Series3	Both	Fgf13a
20201109Series3	Both	Fgf13a
20201109Series3	Both	Fgf13a
20201109Series3	Both	Fgf13a
20201109Series3	Both	Fgf13a
20201109Series3	Both	Fgf13a
20201109Series3	Both	Fgf13a
20201109Series3	Both	Fgf13a
20201109Series3	Both	Fgf13a
20201109Series3	Both	Fgf13a
20201109Series3	Both	Fgf13a
20201109Series3	Both	Fgf13a
20201109Series3	Both	Fgf13a
20201109Series3	Both	Fgf13a
20201109Series3	Hnk	Fgf13a

## Sheet: summary
Testing Gene	Count	Cell_Phenotype
fgf13a	344	Both
fgf13a	3	Fgf13a
fgf13a	7	Hnk
Cxcr4b	206	Both
Cxcr4b	2	Cxcr4b
Cxcr4b	2	Hnk
